# Supplementary material
Source: publisher figshare collection journal article supplement (https://karger.figshare.com/ndownloader/files/21355923)
Supplement: Supplementary file 1 [file 21355923]

**Supplementary material 2. Postoperative complications after distal pancreatectomy**

|  | No. of patients (%) |
| --- | --- |
|  | (n = 213) |
| Clavien-Dindo classification | |
| I | 16 (8) |
| II | 6 (3) |
| IIIa | 143 (67) |
| IIIb | 1 (0.5) |
| IVa | 1 (0.5) |
| IVb | 0 (0) |
| V | 0 (0) |
| Pancreatic fistula | |
| Biochemical leakage | 61 (29) |
| Grade B | 89 (42) |
| Grade C | 2 (1) |
| Delayed gastric emptying | |
| Grade A | 10 (5) |
| Grade B | 2 (1) |
| Grade C | 0 (0) |
| Intra-abdominal abscess | 8 (4) |
| Intra-abdominal hemorrhage | 3 (1) |
| Chylous ascites | 4 (2) |
| Ileus | 1 (0.5) |
| Radiological intervention | 9 (4) |
